# Supplementary material for: Improved Raman and photoluminescence sensitivity achieved using bifunctional Ag@SiO2 nanocubes
Source: Royal Society of Chemistry journal article supplement (doi:10.1039/c4cp05217j), 2015-01-01
Supplement: c4cp05217j1.pdf [file c4cp05217j1.pdf]

**(Support information)**

**Improved Raman and Photoluminescence Sensitivity Achieved Using  
Bifunctional Ag@SiO<sub>2</sub> Nanocubes**

**Nguyen Minh Kha<sup>a</sup>, Ching-Hsiang Chen<sup>\*b</sup>, Wei-Nien Su<sup>b</sup>, John Rick<sup>b</sup>, Bing-Joe Hwang<sup>\*a,c</sup>**

*<sup>a</sup>NanoElectrochemistry Laboratory, Department of Chemical Engineering, National Taiwan University of Science and Technology, Taipei 106, Taiwan.*

*<sup>b</sup>NanoElectrochemistry Laboratory, Graduate Institute of Applied Science and Technology, National Taiwan University of Science and Technology, Taipei 106, Taiwan.*

*<sup>c</sup>National Synchrotron Radiation Research Center, Hsin-Chu, Taiwan*

*\*Corresponding authors: [bluse@mail.ntust.edu.tw](mailto:bluse@mail.ntust.edu.tw) and [bjh@mail.ntust.edu.tw](mailto:bjh@mail.ntust.edu.tw)*

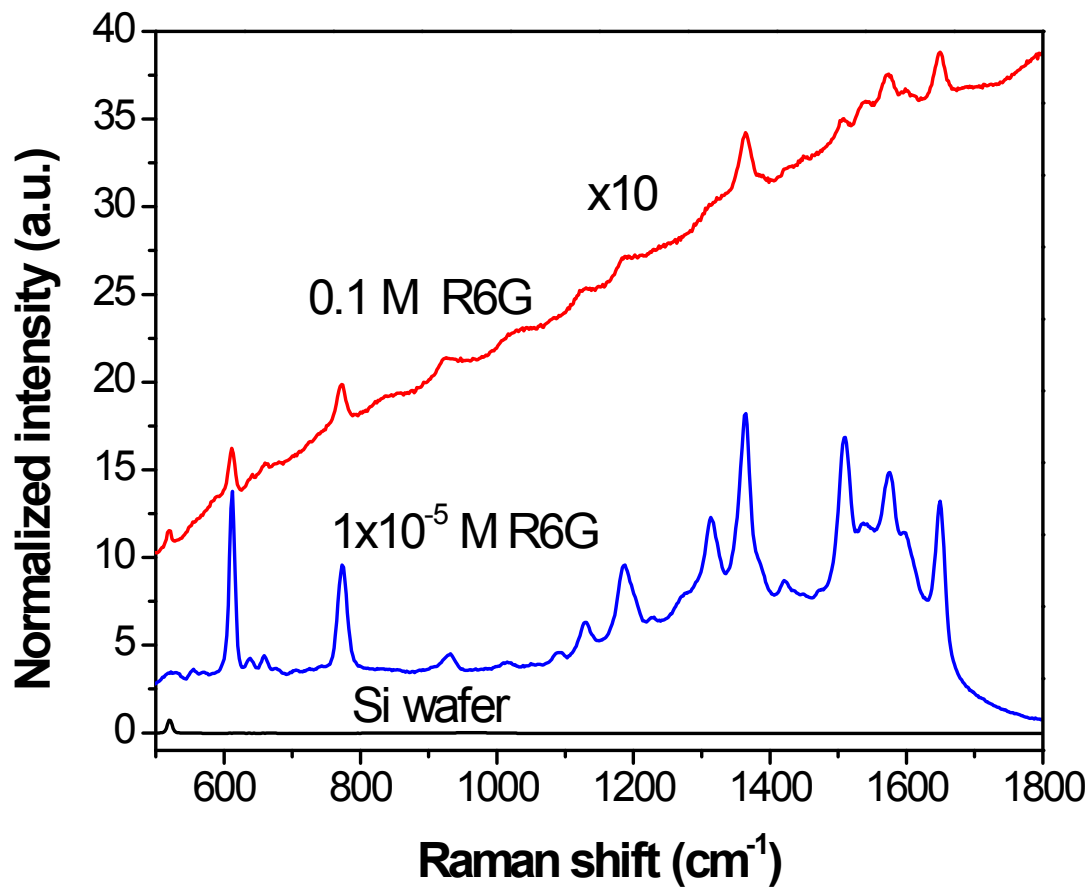

**Fig. S1** Raman spectra with the excitation laser 532 nm of silicon wafer,  $1 \times 10^{-5}$  M R6G on the Ag NCs substrate, and 0.1 M R6G on a silicon substrate (10 times)

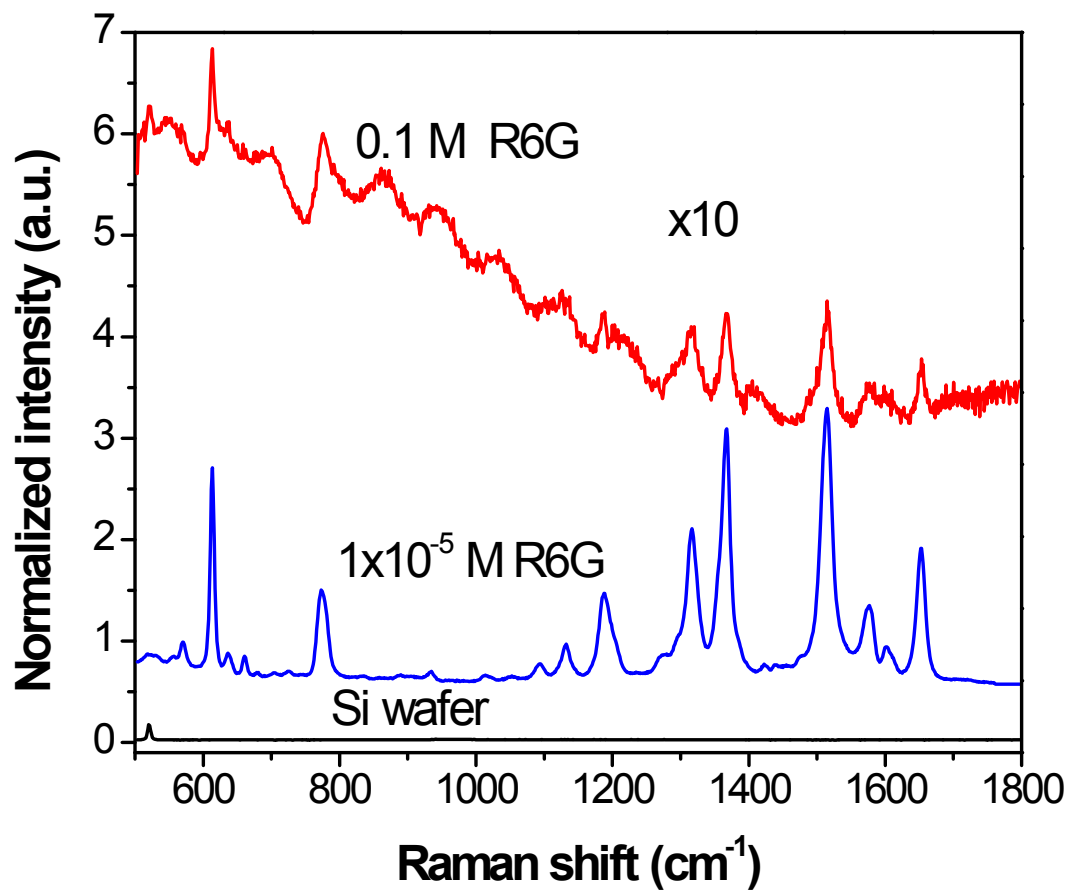

**Fig. S2** Raman spectra with the excitation laser 632.8 nm of silicon wafer,  $1 \times 10^{-5}$  M R6G on the Ag NCs substrate, and 0.1 M R6G on a silicon substrate (10 times)
